# Supplementary material for: Next-generation sequencing analysis of receptor-type tyrosine kinase genes in surgically resected colon cancer: identification of gain-of-function mutations in the RET proto-oncogene
Source: J Exp Clin Cancer Res. 2018 Apr 17;37:84. doi: 10.1186/s13046-018-0746-y (PMC5905113; doi:10.1186/s13046-018-0746-y)
Supplement: Supplementary file 1 — Table S1. Clinical-pathological characteristics of the 37 colon cancer patients included in the study. (XLSX 12 kb) [file 13046_2018_746_MOESM1_ESM.xlsx]

## Sheet: Supplemental Table S1
Additional file 1. Supplemental Table S1. Clinical-pathological features of the 37 colon cancer patients included in the study.
Sample Name	Age	Sex	T	N	M	Lymph Node Ratio > 0.25 *	Grade	Stage	Survival (days)	Death
CC01	64	M	T2	N0	M0	no	G2	I	560	no
CC02	71	F	T3	N2	M0	yes	G2	II	973	no
CC03	61	F	T3	N1	M0	no	G2	III	967	no
CC04	50	M	T2	N0	M0	no	G2	NA	972	no
CC05	47	F	T4	N0	M0	no	G3	II	603	no
CC06	56	M	T3	N1	M0	no	G2	III	387	no
CC07	69	F	T3	NA	NA	no	G2	II	742	no
CC08	83	M	T4	N2	M0	yes	G3	III	1000	no
CC09	83	F	T4	N2	M1	yes	G3	IV	562	yes
CC10	58	M	T3	N0	M0	no	G2	II	416	no
CC11	73	M	T3	N0	M0	no	G3	II	740	no
CC12	83	M	T3	N0	M0	no	NA	II	1240	no
CC13	76	M	T3	N0	M0	no	G2	II	1135	no
CC14	63	M	T4	N0	M0	no	G2	II	1374	no
CC15	56	M	T3	N0	M0	no	G2	II	274	yes
CC16	78	M	T3	N0	M0	no	G2	II	1217	no
CC17	49	M	T1	N0	M0	no	NA	I	1090	no
CC18	82	F	T3	N0	M0	no	G2	I	403	no
CC19	75	F	T3	N0	M0	no	G2	II	924	no
CC20	77	F	T2	N0	M0	no	G2	I	NA	no
CC21	77	M	T2	N0	M0	NA	G1	I	NA	no
CC22	78	M	T3	N2	M0	no	G2	I	923	no
CC23	73	M	T3	N0	M0	no	G2	II	412	no
CC24	63	M	T4	N2	M0	yes	G3	III	515	yes
CC25	61	M	T1	N0	M0	no	G2	I	197	no
CC26	75	F	T3	N2	M0	no	G2	III	1226	no
CC27	62	M	T3	N1	M0	no	G3	III	1282	no
CC28	56	F	T3	N0	M1	no	G3	IV	274	no
CC29	84	M	T3	N1	M0	no	G2	III	560	no
CC30	68	F	T3	N2	M0	no	G3	III	1373	no
CC31	68	M	T3	N1	M0	no	G2	III	956	no
CC32	63	M	T2	N1	M0	no	G2	III	1184	no
CC33	60	M	T3	N1	M1	no	G3	IV	1441	yes
CC34	69	F	T3	N0	M0	no	G2	II	2130	no
CC35	68	M	T4	N0	M0	no	G2	III	1048	no
CC36	80	M	T3	N1	M0	no	G2	III	1461	no
CC37	70	F	T4	N1	M1	no	G2	IV	182	yes
		* defined as the ratio of the number of positive lymph nodes to the total number of lymph nodes removed
