# Supplementary material for: Next-generation sequencing analysis of receptor-type tyrosine kinase genes in surgically resected colon cancer: identification of gain-of-function mutations in the RET proto-oncogene
Source: J Exp Clin Cancer Res. 2018 Apr 17;37:84. doi: 10.1186/s13046-018-0746-y (PMC5905113; doi:10.1186/s13046-018-0746-y)
Supplement: Supplementary file 2 — Table S2. Summary of the variants identified in RTKs. (XLSX 16 kb) [file 13046_2018_746_MOESM2_ESM.xlsx]

## Sheet: Supplemental Table S2
Supplemental Table S2. Summary of variants identified in RTKs
Gene	Frequency	Type	A.A Change	Mutated allele Frequency in %	Patient	Domain - uniprot
ALK	13,57% (5/37)	Receptor	G1261D	46	CC09	Protein Kinase
			S619F	6.9	CC27	MAM2
			Y479I	48.4	CC15	MAM2
			NA	51.6	CC15	*
			I208T	52.2	CC11	MAM1
AXL	5,4% (2/37)	Receptor	S265L	14	CC26	Fibronectin type-III 1
			V737M	30.8	CC12	Protein kinase
CSF1R	2,7% (1/37)	Receptor	R294W	37.3	CC25	Ig-like C2-type 3
DDR2	2,7% (1/37)	Receptor	D45G	13.1	CC27	F5/8 type C
EGFR	13,5% (5/37)	Receptor	R669*	28.5	CC25	Protein kinase
			W731*	8.2	CC27	Protein kinase
			D807E	21.5	CC28	Protein kinase
			L933P	26.4	CC34	Protein kinase
EPHA3	8% (3/37)	Receptor	K713T	63.6	CC14	Protein kinase
			T974M	mean 16,5	CC34; CC20	SAM
EPHA7	16,2% (6/37)	Receptor	D839G	17.3	CC34	Protein kinase
			P805L	Mean 6,2	CC02; CC09; CC14; CC24	Protein kinase
			P278S	100	CC13	*
EPHB1	8% (3/37)	Receptor	V718M	60.2	CC09	Protein kinase
			D775Y	6.3	CC12	Protein kinase
			A922T	26.3	CC15	SAM
EPHB4	8% (3/37)	Receptor	V912M	8.6	CC27	SAM
			V682M	15.9	CC17	Protein kinase
			G462R	48.1	CC08	Fibronectin type-III 2
EPHB6	16,2% (6/37)	Receptor	P165PL	41.3	CC12	*
			FRAMESHIFT	5.5	CC33	*
			G252E	6.7	CC30	Eph LBD
			V256A	13.7	CC34	Eph LBD
			R733W	5.3	CC12	Protein kinase
			R733Q	9.7	CC26	Protein kinase
ERBB2	18,9% (7/37)	Receptor	S310F	12.8	CC24	DISSULFITE BOND
			W482C	Mean 7,5	CC09; CC26	*
			Q533*	5.4	CC33	*
			T631A	6.1	CC37	Protein kinase
			S819F	6.4	CC33	Protein kinase
			A1216D	49.8	CC04	Interaction with PIK3C2B
ERBB3	5,4% (2/37)	Receptor	T389I	36.4	CC03	*
			V850M	9.2	CC27	Protein kinase
ERBB4	10,8% (4/37)	Receptor	R983K	5.6	CC26	Protein kinase
			M977V	10.2	CC34	Protein kinase
			R847H	41.3	CC36	Protein kinase
			T244I	53.1	CC11	*
FGFR1	5,4% (2/37)	Receptor	D784E	7.7	CC37	Protein kinase
			A131V	49.6	CC12	*
FGFR2	5,4% (2/37)	Receptor	G302K	8.4	CC37	Ig-like C2-type 3
			L104P	17.1	CC34	Ig-like C2-type 1
FGFR3	10,8% (4/37)	Receptor	D320N	50.8	CC04	Ig-like C2-type 3
			A352E	36.7	CC25	Ig-like C2-type 3
			A571V	48.9	CC12	Protein kinase
			T653I	5.3	CC37	Protein kinase
FGFR4	16,2% (6/37)	Receptor	R130C	36.6	CC25	*
			FRAMESHIFT	90.5	CC16	*
			KE144RG	9.5	CC16	Ig-like C2-type 2
			F859L	5.4	CC34	*
			T912I	7	CC17; CC30	*
FLT1	1 out of 37	Receptor	L204P	7.7	CC34	Ig-like C2-type 2
FLT3	1 out of 37	Receptor	L558*	5.3	CC03	*
FLT4	40,5% (15/37)	Receptor	G1131S	8.7	CC21	Protein kinase
			R1041Q	8.3	CC24	Protein kinase
			E1026K	14.8	CC27	Protein kinase
			D1003N	6.4	CC30	Protein kinase
			D728N	9.5	CC12	Ig-like C2-type 7
			P707L	22.7	CC20	Ig-like C2-type 8
			FRAMESHIFT	97.3	CC19	*
			FRAMESHIFT	95.6	CC17	*
			FRAMESHIFT	95.9	CC23	*
			P362L	9.1	CC27	Ig-like C2-type 4
			R282*	38.4	CC12	Ig-like C2-type 3
			Q213*	6.8	CC30	Ig-like C2-type 2
			G180R	7.9	CC30	Ig-like C2-type 2
			P138S	20.7	CC20	*
			E36*	5.8	CC12	Ig-like C2-type 1
IGF1R	10,8% (4/37)	Receptor	R391C	Mean 20,3	CC34; CC20	Protein kinase
			D679N	9.6	CC24	*
			I1151M	8.6	CC34	*
KDR	10,8% (4/37)	Receptor	R1066H	10.6	CC12	Protein kinase
			C482R	Mean 48,5	CC04; CC09; CC24	Ig-like C2-type 5
KIT	5,4% (2/37)	Receptor	P551R	8.8	CC27	Protein kinase
			T661A	12.2	CC34	Protein kinase
LTK	13,5% (5/37)	Receptor	R727H	Mean 22,5	CC18; CC34	Protein kinase
			T72I	6.2	CC30	*
			G23V	Mean 17,5	CC09; CC19	*
MET	5,4% (2/37)	Receptor	A320V	50.1	CC24	Sema
			R988C	39.6	CC30	Protein Kinase
NTRK1	5,4% (2/37)	Receptor	S475F	8.9	CC27	*
			FRAMESHIFT	22.7	CC16	*
NTRK3	5,4% (2/37)	Receptor	M737I	10.8	CC27	Protein Kinase
			N218T	25.9	CC34	Ig-like C2-type 1
PDGFRA	2,7% (2/37)	Receptor	S911N	19	CC27	Protein Kinase
PDGFRB	5,4% (2/37)	Receptor	P676L	Mean 7,2	CC30; CC33	Protein Kinase
RET	10,8% (4/37)	Receptor	R77C	30.5	CC25	*
			P270L	5.9	CC33
			G533C	20.4	CC20	Cys-rich region
			P1047S	48.9	CC12	*
ROS1	18,9% (7/37)	Receptor	G1709C	34.5	CC08	Fibronectin type-III 8
			QG1708HC	16	CC15	Fibronectin type-III 8
			Q1127*	10.1	CC37	Fibronectin type-III 5
			T804N	47.5	CC04	*
			S653F	51	CC18	Fibronectin type-III 3
			P437L	8	CC27	*
			S277Y	18.4	CC34	Fibronectin type-III 2
