# Supplementary material for: Next-generation sequencing analysis of receptor-type tyrosine kinase genes in surgically resected colon cancer: identification of gain-of-function mutations in the RET proto-oncogene
Source: J Exp Clin Cancer Res. 2018 Apr 17;37:84. doi: 10.1186/s13046-018-0746-y (PMC5905113; doi:10.1186/s13046-018-0746-y)
Supplement: Supplementary file 4 — Table S4. Sequencing metrics of the identified RET mutations. (XLSX 10 kb) [file 13046_2018_746_MOESM4_ESM.xlsx]

## Sheet: Supplemental Table S4
Supplemental Table S4. Sequencing metrics of the identified RET mutations
Chromosome	Start	End	Reference	Variant Allele	Frequency	Quality	Coverage	Allele Cov	Strand Bias	Position in Protein	Amino Acid Change
10	43622122	43622122	C	T	0.49	224.95	45	22	0.6718	1047-1047	P->S
10	43596062	43596062	C	T	0.305	189.35	89	25	0.5573	77-77	R->C
10	43607621	43607621	G	T	0.204	527.19	442	89	0.59966	533-533	G->C
10	436000583	436000583	CC	TT	0.059	41.4	391	23	0.654	270-270	P->L
